# Supplementary material
Source: ML conference proceedings conference paper supplement (https://openaccess.thecvf.com/content/cvpr_2017/html/Nech_Level_Playing_Field_2017_CVPR_paper.html)
Supplement: Supplementary file 1 [file Nech_Level_Playing_Field_2017_CVPR_supplemental.pdf.pdf]

# Level Playing Field for Million Scale Face Recognition

## Supplementary Material

Aaron Nech      Ira Kemelmacher-Shlizerman  
 University of Washington  
 Dept. of Computer Science and Engineering  
 {necha, kemelmi}@cs.washington.edu

Additional statistics of the MF2 set:

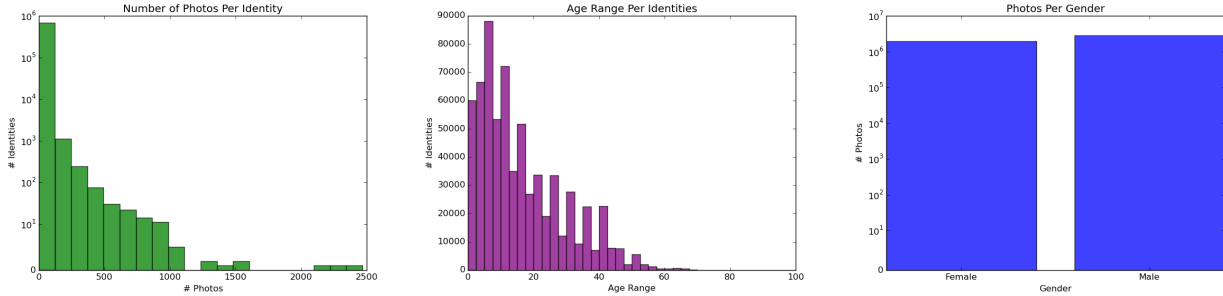

Figure 1. **Left:** Photos per identity in the data set. **Center:** Age distribution. **Right:** Gender distribution.

For comparison and completeness, we show results of [2] and [1], which are the biggest benchmarks for face recognition currently. Both allow any training data, while in this paper only the new proposed public MF2 was allowed to use for training.

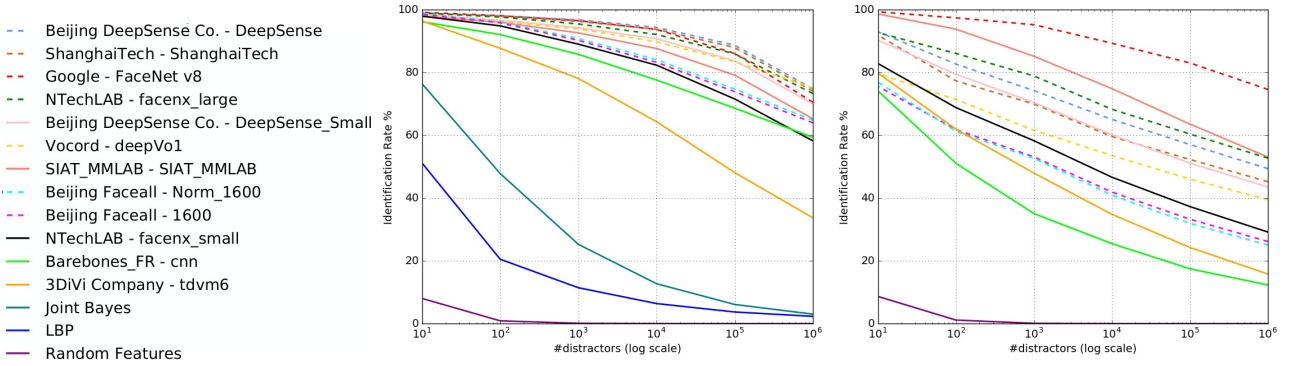

Figure 2. Megaface Challenge 1 [2] (unrestricted training set) rank-1 **identification** rates under up to 1M distractors (varying by factors of 10) using FaceScrub (**left**) and FG-Net (**right**) as probe images. Note that the results of MF2 challenge (with public training set) are comparable to those results (any training data).

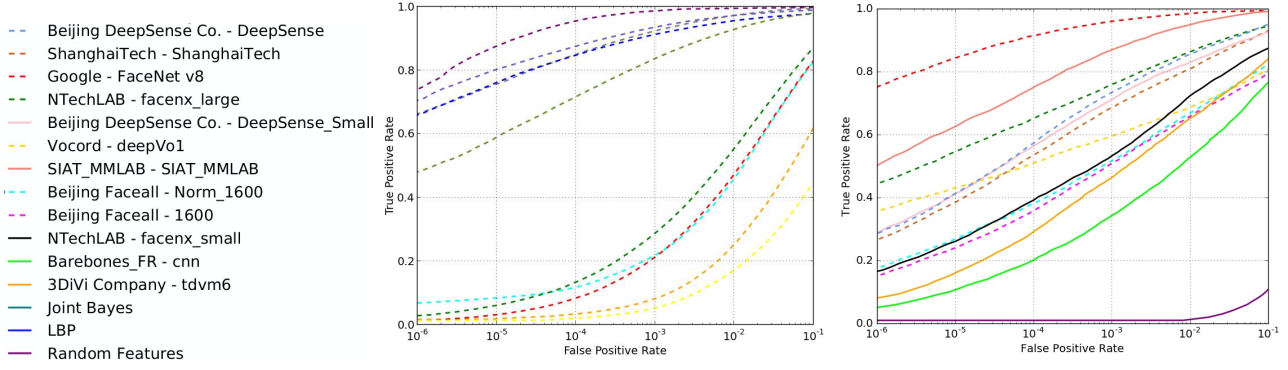

Figure 3. Megaface Challenge 1 [2] (unrestricted training set) **verification** performance rates with 1M distractors using FaceScrub (**left**) and FG-Net (**right**) as probe images. Note that the results of MF2 challenge (with public training set) are comparable to those results (any training data).

| Rank | TeamID | TeamName      | Data    | Coverage@P-95 | Coverage@P-99 |
|------|--------|---------------|---------|---------------|---------------|
| 1    | 14     | DRNLSCR       | Aligned | 0.734         | 0.525         |
| 2    | 8      | ITRC-SARI     | Aligned | 0.707         | 0.108         |
| 3    | 13     | CIGIT_NLPR    | Aligned | 0.684         | 0.045         |
| 4    | 20     | ms3rz         | Aligned | 0.646         | 0.343         |
| 5    | 10     | 1510          | Aligned | 0.570         | 0.065         |
| 6    | 7      | FaceAll       | Aligned | 0.554         | 0.417         |
| 7    | 17     | faceman       | Aligned | 0.461         | 0.339         |
| 8    | 18     | BUPT_PRIS     | Aligned | 0.421         | 0.216         |
| 9    | 21     | IMMRB3RZ      | Aligned | 0.171         | 0.104         |
| 10   | 12     | CIIDIP        | Aligned | 0.154         | 0.025         |
| 11   | 11     | BUPT_MCPRL    | Cropped | 0.064         | 0.006         |
| 12   | 19     | NII-UIT-KAORI | Aligned | 0.001         | 0.001         |
| 13   | 6      | DS_NFS        | Aligned | -             | -             |
| 13   | 23     | Paparazzi     | Aligned | -             | -             |

| Rank | TeamID | TeamName      | Data    | Coverage@P-95 | Coverage@P-99 |
|------|--------|---------------|---------|---------------|---------------|
| 1    | 13     | CIGIT_NLPR    | Aligned | 0.534         | 0.026         |
| 2    | 14     | DRNLSCR       | Aligned | 0.486         | 0.336         |
| 3    | 17     | faceman       | Aligned | 0.330         | 0.211         |
| 4    | 20     | ms3rz         | Aligned | 0.260         | 0.110         |
| 5    | 7      | FaceAll       | Aligned | 0.254         | 0.142         |
| 6    | 18     | BUPT_PRIS     | Aligned | 0.210         | 0.117         |
| 7    | 21     | IMMRB3RZ      | Aligned | 0.042         | 0.039         |
| 8    | 11     | BUPT_MCPRL    | Cropped | 0.040         | 0.007         |
| 9    | 12     | CIIDIP        | Aligned | 0.020         | 0.018         |
| 10   | 8      | ITRC-SARI     | Aligned | 0.004         | 0.004         |
| 11   | 6      | DS_NFS        | Aligned | 0.001         | 0.001         |
| 11   | 10     | 1510          | Aligned | 0.001         | 0.001         |
| 13   | 23     | Paparazzi     | Aligned | -             | -             |
| 13   | 19     | NII-UIT-KAORI | Aligned | -             | -             |

Figure 4. Results of [1] presented here for comparison and completeness. Left: easy set. Right: hard set. Note that the results of MF2 challenge (with public training set) are comparable to those results (any training data).

## References

- [1] Y. Guo, L. Zhang, Y. Hu, X. He, and J. Gao. Ms-celeb-1m: Challenge of recognizing one million celebrities in the real world. In *IS&T International Symposium on Electronic Imaging*, 2016.
- [2] I. Kemelmacher-Shlizerman, S. M. Seitz, D. Miller, and E. Brossard. The megaface benchmark: 1 million faces for recognition at scale. In *Proceedings of the IEEE Conference on Computer Vision and Pattern Recognition*, 2016.
